# Supplementary material for: Spatiotemporal Analysis of Malaria Transmission in the Autonomous Indigenous Regions of Panama, Central America, 2015–2022
Source: MDPI journal article supplement (doi:10.3390/tropicalmed9040090), 2024-04-22
Supplement: s1 [file s1]

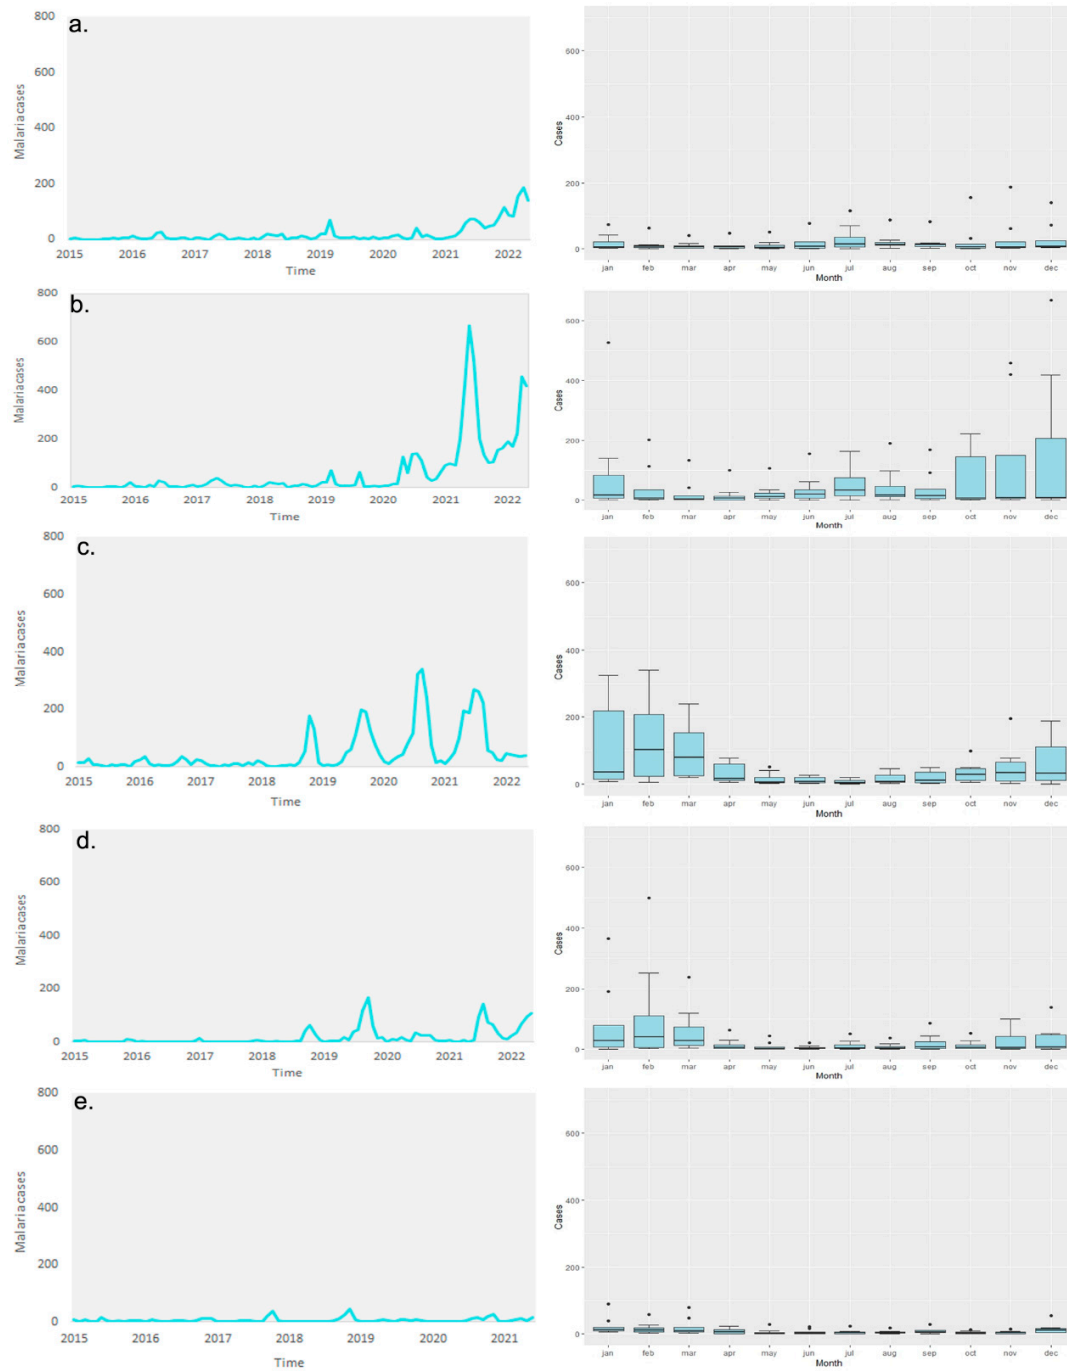

**Figure S1.** Weekly evolution and monthly distribution of malaria cases in each comarca from Panama, 2015-2022: a) Ngobe Bugle, b) Guna Yala, c) Madungandí, d) Wargandí, e) Emberá Wounáan.

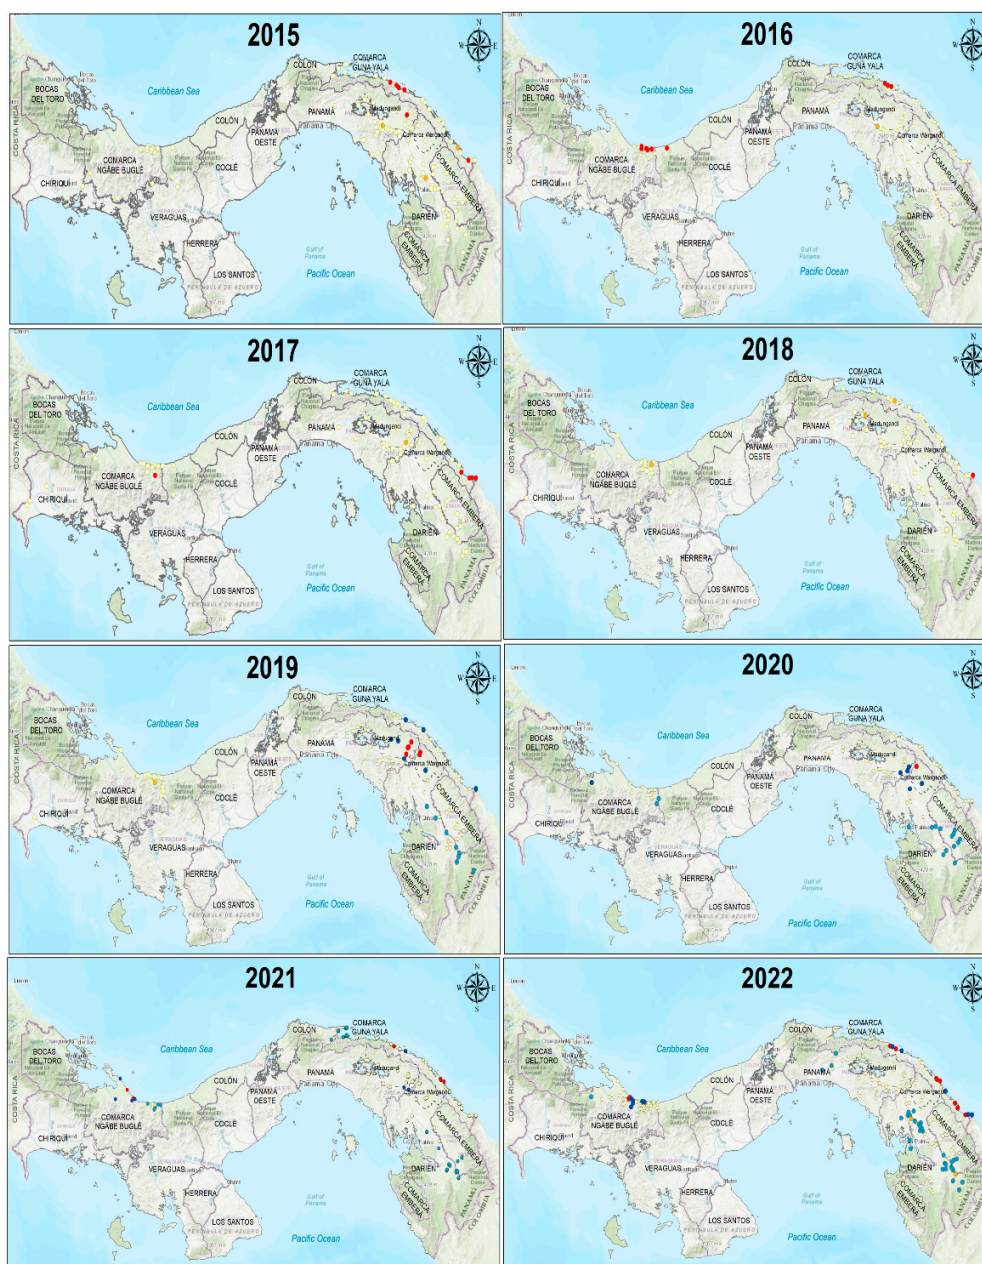

### Cluster and Outlier Analysis (Anselin Local Moran's I)

● High-High Cluster 
 ● High-Low Outlier 
 ● Not Significant 
 ● Low-High Outlier 
 ● Low-Low Cluster

Service Layer Credits: Sources: Esri, HERE, Garmin, Intermap, increment P Corp., GEBCO, USGS, FAO, NPS, NRCAN, GeoBase, IGN, Kadaster NL, Ordnance Survey, Esri Japan, METI, Esri China (Hong Kong), (c) OpenStreetMap contributors, and the GIS User Community

**Figure S2.** Spatial autocorrelation of malaria cases from 2015 to 2022 in Panamá

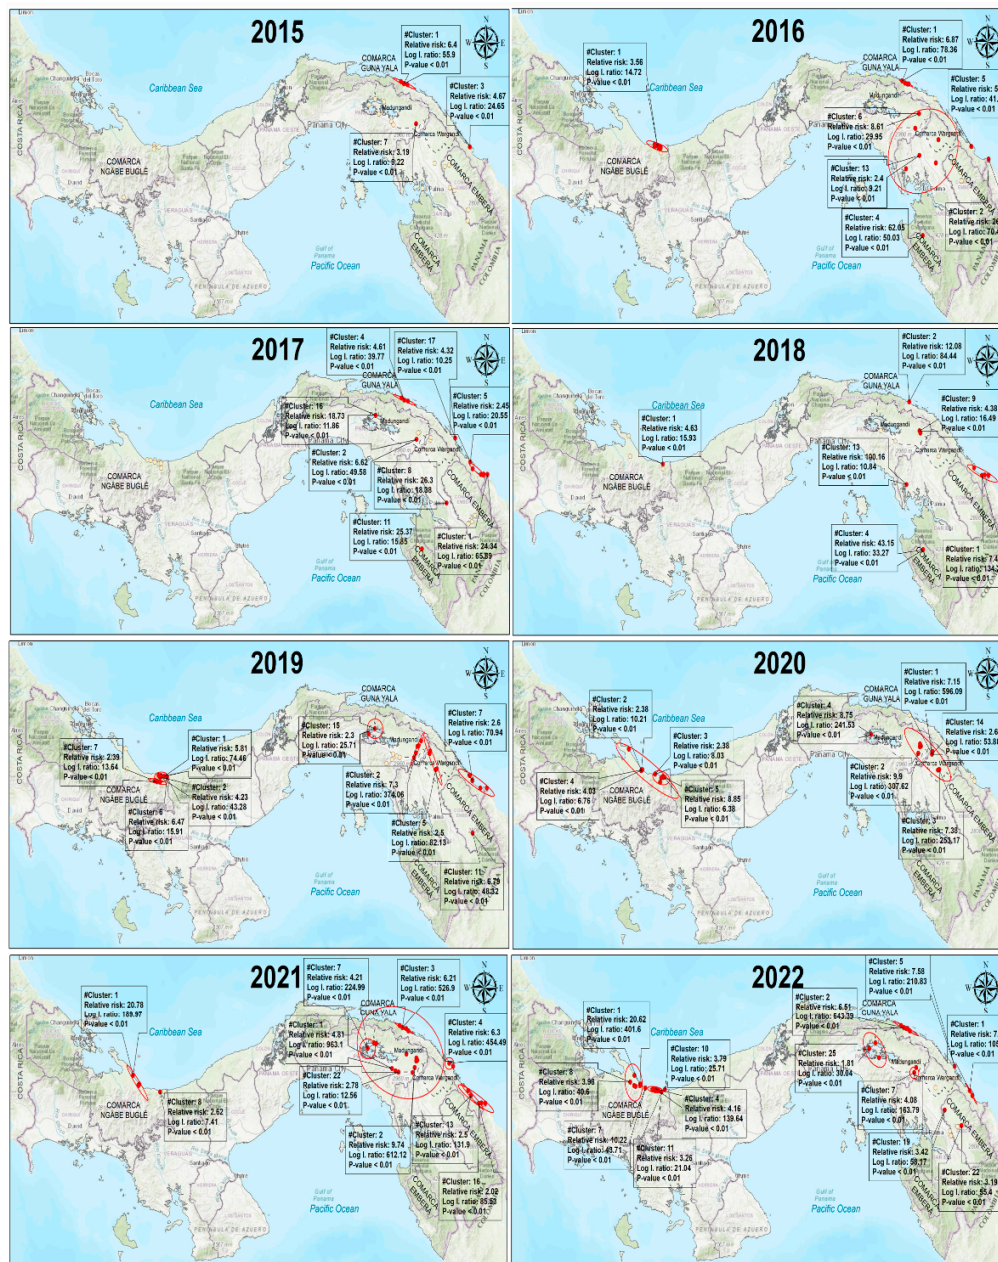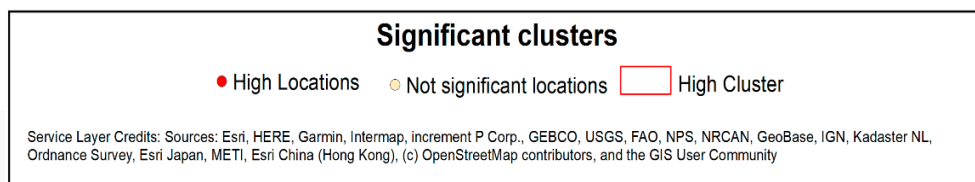

**Figure S3.** Cluster of malaria cases detected using the purely temporal clustering from 2015 to 2022 in Panama.



**Table S1:** Spatial scan statistics of significant clusters of malaria cases at the Indigenous Comarcas in the western region of Panama, January 2015 to December 2022

| Year | Cluster | Locality (High clusters)                   | Population | Malaria cases | Malaria cases (expected) | RR    | LRR    | p      |
|------|---------|--------------------------------------------|------------|---------------|--------------------------|-------|--------|--------|
| 2016 | 1       | Segunda Corriente                          | 893        | 53            | 29.46                    | 3.56  | 14.72  | < 0.01 |
|      |         | Quebrada Peña,                             |            |               |                          |       |        |        |
|      |         | Loma Chucara                               |            |               |                          |       |        |        |
|      |         | Limoncito                                  |            |               |                          |       |        |        |
|      |         | Segunda Corriente                          |            |               |                          |       |        |        |
|      |         | Santa Catalina Arriba                      |            |               |                          |       |        |        |
| 2018 | 1       | Santa Catalina o Calovébora                | 768        | 166           | 77.88                    | 5.81  | 74.46  | < 0.01 |
|      |         | Aguacate Arriba                            |            |               |                          |       |        |        |
|      |         | Boca de Aguacate                           |            |               |                          |       |        |        |
|      |         | Aguacate Arriba                            |            |               |                          |       |        |        |
|      |         | San Soledad                                |            |               |                          |       |        |        |
|      |         | Llano Piña                                 |            |               |                          |       |        |        |
|      |         | Caño Escondido (Santa Catlina)             |            |               |                          |       |        |        |
|      |         | Boca de Tontri o Toncri                    |            |               |                          |       |        |        |
|      |         | Cahuita Arriba                             |            |               |                          |       |        |        |
|      |         | Los Primitivos                             |            |               |                          |       |        |        |
|      |         | Boca de Aguacate                           |            |               |                          |       |        |        |
|      |         | Aguacate Arriba                            |            |               |                          |       |        |        |
|      |         | Llano Piña                                 |            |               |                          |       |        |        |
|      |         | Caño Escondido (Santa Catalina)            |            |               |                          |       |        |        |
|      |         | Los Primitivos                             |            |               |                          |       |        |        |
|      |         | Loma Pava                                  |            |               |                          |       |        |        |
|      |         | Alto Piña                                  |            |               |                          |       |        |        |
|      |         | San Soledad                                |            |               |                          |       |        |        |
| 2020 | 3       | Caracol No. 1                              | 334        | 35            | 17.83                    | 2.38  | 8.03   | < 0.01 |
|      |         | Alto Piña                                  |            |               |                          |       |        |        |
|      |         | Santa Catalina Arriba or Quebrada Catalina |            |               |                          |       |        |        |
|      |         | Boca de Aguacate                           |            |               |                          |       |        |        |
|      |         | Aguacate Arriba                            |            |               |                          |       |        |        |
|      |         | Caño Escondido                             |            |               |                          |       |        |        |
|      | 5       | Caño Lagarto                               | 55         | 11            | 2.94                     | 4.03  | 6.76   | < 0.01 |
| 2021 | 1       | Tiger Head or Playa Tigre                  | 151        | 115           | 12.3                     | 20.78 | 189.97 | < 0.01 |
|      |         | Librate                                    |            |               |                          |       |        |        |
|      |         | Begabudi                                   |            |               |                          |       |        |        |
|      |         | Caño Lagarto                               |            |               |                          |       |        |        |
|      | 7       | Aguacate Arriba                            | 116        | 23            | 9.45                     | 2.62  | 7.4    | < 0.01 |
| 2022 | 1       | Librate                                    | 100        | 203           | 11.98                    | 20.62 | 401.6  | < 0.01 |
|      |         | Begabudi                                   |            |               |                          |       |        |        |
|      |         | Caño Lagarto                               |            |               |                          |       |        |        |
|      | 4       | Chelele                                    | 561        | 234           | 67.2                     | 4.16  | 139.63 | < 0.01 |
|      |         | Caracol No. 1                              |            |               |                          |       |        |        |
|      |         | Segunda Corriente                          |            |               |                          |       |        |        |
|      |         | Quebrada Peña                              |            |               |                          |       |        |        |
|      |         | Loma Chucara                               |            |               |                          |       |        |        |
|      | 7       | Limoncito                                  | 26         | 31            | 3.11                     | 10.22 | 43.71  | < 0.01 |
|      |         | Palo Blanco                                |            |               |                          |       |        |        |
|      |         | Odobari                                    |            |               |                          |       |        |        |
|      | 8       | Dorori or Brodori Medio                    | 145        | 66            | 17.37                    | 3.98  | 40.6   | < 0.01 |
|      |         | Tiger Head or Playa Tigre                  |            |               |                          |       |        |        |
|      |         | Muay Abajo                                 |            |               |                          |       |        |        |
|      | 10      | Zaragoza                                   | 100        | 44            | 11.98                    | 3.79  | 25.71  | < 0.01 |
|      | 11      | Aguacate Arriba                            | 116        | 44            | 13.89                    | 3.26  | 21.04  | < 0.01 |

**Table S2:** Spatial scan statistics of significant clusters of malaria cases at the Indigenous Comarcas in the eastern region of Panama, January 2015 to December 2022.

| Time | Cluster | Locality (high clusters)           | Population | Malaria cases | Malaria cases (expected) | RR     | LLR    | p      |
|------|---------|------------------------------------|------------|---------------|--------------------------|--------|--------|--------|
| 2015 | 1       | Achiote or Achiotal or Maguebgandi | 944        | 78            | 13.26                    | 6.87   | 78.36  | < 0.01 |
|      |         | Río Diablo or Aidirgandi           |            |               |                          |        |        |        |
|      |         | Wichub Mullu                       |            |               |                          |        |        |        |
|      |         | Playón Grande or Ukupa             |            |               |                          |        |        |        |
|      | 3       | La Mel                             | 90         | 31            | 1.26                     | 26.21  | 70.42  | < 0.01 |
| 2016 | 7       | Puerto Limón or Narasgandi         | 573        | 20            | 6.51                     | 3.19   | 9.22   | < 0.01 |
|      | 1       | Achiote or Achiotal or Maguebgandi | 944        | 78            | 13.26                    | 6.87   | 78.36  | < 0.01 |
|      |         | Río Diablo or Aidirgandi           |            |               |                          |        |        |        |
|      |         | Wichub Mullu                       |            |               |                          |        |        |        |
|      |         | Playón Grande or Ukupa             |            |               |                          |        |        |        |
|      | 2       | La Miel                            | 90         | 31            | 1.26                     | 26.21  | 70.42  | < 0.01 |
|      | 4       | Boca De Tigre                      | 19         | 16            | 0.27                     | 62.05  | 50.03  | < 0.01 |
|      | 5       | Carreto or Yansibdiwar             | 692        | 49            | 9.72                     | 5.52   | 41.73  | < 0.01 |
|      | 6       | Cañazas o Narganí                  | 208        | 24            | 2.92                     | 8.61   | 29.95  | < 0.01 |
|      | 13      | La Peñita                          | 1022       | 33            | 14.36                    | 2.4    | 9.21   | < 0.01 |
|      |         | Río Cañazas or Akanwila            |            |               |                          |        |        |        |
|      |         | Quebrada Muerto                    |            |               |                          |        |        |        |
|      |         | Villa Nueva                        |            |               |                          |        |        |        |
| 2017 | 1       | La Miel                            | 90         | 30            | 1.33                     | 24.34  | 65.89  | < 0.01 |
|      |         | Puerto Limón or Narasgandí         | 573        | 50            | 8.47                     | 6.62   | 49.58  | < 0.01 |
|      | 4       | Achiote or Achiotal or Maguebgandí | 943        | 57            | 13.93                    | 4.61   | 39.77  | < 0.01 |
|      |         | Río Diablo or Aidirgandí           |            |               |                          |        |        |        |
|      |         | Playón Grande or Ukupa             |            |               |                          |        |        |        |
|      | 5       | Carreto or Yansibdiwar             | 2406       | 77            | 35.55                    | 2.45   | 20.55  | < 0.01 |
|      |         | Anachucuna or Aswemullu            |            |               |                          |        |        |        |
|      |         | Armila                             |            |               |                          |        |        |        |
|      |         | Puerto obaldía                     |            |               |                          |        |        |        |
|      | 8       | Quebrada Grande                    | 21         | 8             | 0.31                     | 26.3   | 18.38  | < 0.00 |
|      | 11      | Boca De Tigre                      | 19         | 7             | 0.28                     | 25.37  | 15.85  | < 0.01 |
|      | 16      | Espavé (P)                         | 22         | 6             | 0.33                     | 18.73  | 11.86  | < 0.01 |
|      | 17      | Isla Pino or Dubbag                | 242        | 15            | 3.58                     | 4.32   | 10.25  | < 0.01 |
| 2018 | 1       | Anachucuna or Aswemullu            | 1804       | 139           | 27.22                    | 7.4    | 134.29 | < 0.01 |
|      |         | Armila                             |            |               |                          |        |        |        |
|      |         | Puerto obaldía                     |            |               |                          |        |        |        |
|      |         | La Miel                            |            |               |                          |        |        |        |
|      | 2       | Playón Grande or Ukupa             | 354        | 56            | 5.34                     | 12.08  | 84.44  | < 0.01 |
|      | 4       | Boca de Tigre                      | 19         | 12            | 0.29                     | 43.15  | 33.27  | < 0.01 |
|      | 9       | Cañazas or Nargandí                | 381        | 24            | 5.75                     | 4.38   | 16.49  | < 0.01 |
|      |         | Río Sábalo                         |            |               |                          |        |        |        |
|      | 13      | La Peñita                          | 3          | 2             | 0.03                     | 100.16 | 10.84  | < 0.01 |

|      |    |                            |      |     |        |      |        |        |
|------|----|----------------------------|------|-----|--------|------|--------|--------|
| 2019 | 1  | Río Cañazas or Akanwila    | 1379 | 371 | 65.84  | 5.64 | 374.06 | < 0.01 |
|      |    | Puerto Limón or Narasgandi |      |     |        |      |        |        |
|      |    | Naca U ogobnawila          |      |     |        |      |        |        |
|      |    | Rio Sabalo                 |      |     |        |      |        |        |
|      |    | Cañazas or Nargandi        |      |     |        |      |        |        |
|      | 5  | Walá                       | 2885 | 300 | 137.74 | 2.5  | 85.12  | < 0.01 |
|      |    | Nurra                      |      |     |        |      |        |        |
|      |    | Wagandí                    |      |     |        |      |        |        |
|      |    | Morti                      |      |     |        |      |        |        |
|      | 2  | Río Cañazas or Akanwila    | 1379 | 371 | 65.84  | 7.3  | 374.06 | < 0.01 |
|      |    | Puerto Limón or Narasgandi |      |     |        |      |        |        |
|      |    | Naca U ogobnawila          |      |     |        |      |        |        |
|      |    | Rio Sabalo                 |      |     |        |      |        |        |
|      | 5  | Cañazas or Nargandi        | 2885 | 300 | 137.74 | 2.5  | 82.13  | < 0.01 |
|      |    | Walá                       |      |     |        |      |        |        |
|      |    | Nurra                      |      |     |        |      |        |        |
|      |    | Wagandí                    |      |     |        |      |        |        |
|      | 7  | Morti                      | 2083 | 232 | 99.45  | 2.6  | 70.94  | < 0.01 |
|      |    | Carreto or Yansibdiwar     |      |     |        |      |        |        |
|      |    | Anachucuna                 |      |     |        |      |        |        |
|      |    | Pueblo Nuevo-Ng            |      |     |        |      |        |        |
|      | 11 | Armila                     | 146  | 46  | 6.97   | 6.79 | 48.32  | < 0.01 |
|      |    | La Miel                    |      |     |        |      |        |        |
|      |    | El Tigre                   |      |     |        |      |        |        |
|      |    | Puente Bayano or Akua Yala |      |     |        |      |        |        |
|      | 15 | Pintupu or Iguayala        | 947  | 100 | 45.21  | 2.3  | 25.71  | < 0.01 |
|      |    |                            |      |     |        |      |        |        |
| 2020 | 1  | Puerto Limón or Narasgandi | 4249 | 759 | 207.99 | 7.15 | 596.09 | < 0.01 |
|      |    | Naca U ogobnawila          |      |     |        |      |        |        |
|      |    | Cañazas or Nargandi        |      |     |        |      |        |        |
|      |    | Río Sábalo or Kuinubdi     |      |     |        |      |        |        |
|      |    | Wala                       |      |     |        |      |        |        |
|      |    | Nurra                      |      |     |        |      |        |        |
|      |    | Wagandí                    |      |     |        |      |        |        |
|      | 2  | Mortí                      | 573  | 234 | 28.05  | 9.9  | 307.62 | < 0.01 |
|      |    | Puerto Limón or Narasgandi |      |     |        |      |        |        |
|      |    | Akuayala or Puente Bayano  |      |     |        |      |        |        |
|      | 14 | Wala                       | 1444 | 170 | 70.68  | 2.61 | 53.88  | < 0.01 |

|            |                               |                                    |      |        |        |       |         |        |
|------------|-------------------------------|------------------------------------|------|--------|--------|-------|---------|--------|
| 2021       | 1                             | Akuayala or Puente Bayano          | 7397 | 1863   | 706.41 | 4.81  | 963.10  | < 0.01 |
|            |                               | Pintupu or Iguayalla               |      |        |        |       |         |        |
|            |                               | Aguas Claras or Icantí             |      |        |        |       |         |        |
|            |                               | Ipetí Kuna                         |      |        |        |       |         |        |
|            |                               | Wacuco or Dianwardumadí (P)        |      |        |        |       |         |        |
|            |                               | Río Rubén or Quidmorgandí (P)      |      |        |        |       |         |        |
|            |                               | Maguebgandi or Achiote             |      |        |        |       |         |        |
|            |                               | Aidirgandi or Piedra De Amolar     |      |        |        |       |         |        |
|            |                               | Playon Grande or Ukupa             |      |        |        |       |         |        |
|            |                               | Piria                              |      |        |        |       |         |        |
|            |                               | Irgandi                            |      |        |        |       |         |        |
|            |                               | Río Cañazas or Akanwila            |      |        |        |       |         |        |
|            |                               | Puerto Limón 0 Narasgandí          |      |        |        |       |         |        |
|            |                               | Naca                               |      |        |        |       |         |        |
|            | Cañazas or Nargandí           |                                    |      |        |        |       |         |        |
|            | Río Sábalo or Kuinubdi        |                                    |      |        |        |       |         |        |
|            | 2                             | Puerto Limón 0 Narasgandí          | 573  | 465    | 54.72  | 9.74  | 612.12  | < 0.01 |
|            | 3                             | Maguebgandi or Achiote             | 1136 | 574    | 108.49 | 6.21  | 526.90  | < 0.01 |
|            |                               | Aidirgandi or Piedra De Amolar     |      |        |        |       |         |        |
|            | 4                             | Playon Grande or Ukupa             | 914  | 482    | 87.29  | 6.3   | 454.49  | < 0.01 |
|            |                               | Irgandí                            |      |        |        |       |         |        |
|            | 7                             | Mansucun or Mamsuggun              | 947  | 350    | 90.44  | 4.21  | 224.99  | < 0.01 |
|            |                               | Isla Pino                          |      |        |        |       |         |        |
|            | 13                            | Akuayala or Puente Bayano          | 2086 | 456    | 199.21 | 2.5   | 131.90  | < 0.01 |
|            |                               | Pintupu or Iguayalla               |      |        |        |       |         |        |
|            |                               | Yancibdiwar or Carreto             |      |        |        |       |         |        |
| Anachucuna |                               |                                    |      |        |        |       |         |        |
| 16         | Pueblo Nuevo                  | 2689                               | 480  | 256.8  | 2.02   | 85.53 | < 0.01  |        |
|            | Armila                        |                                    |      |        |        |       |         |        |
|            | Pueblo Nuevo                  |                                    |      |        |        |       |         |        |
|            | Puerto obaldía                |                                    |      |        |        |       |         |        |
|            | La Miel                       |                                    |      |        |        |       |         |        |
| 22         | Río Rubén or Quidmorgandí (P) | 125                                | 33   | 11.94  | 2.78   | 12.56 | < 0.01  |        |
| 2022       | 1                             | Carreto or Yansibdiwar             | 1441 | 958    | 151.34 | 7.97  | 1050.59 | < 0.01 |
|            |                               | Anachucuna or Aswemullu            |      |        |        |       |         |        |
|            |                               | Pueblo Nuevo                       |      |        |        |       |         |        |
|            | 2                             | Maguebgandi or Achiote or Achiotal | 1137 | 669    | 119.41 | 6.51  | 643.39  | < 0.01 |
|            |                               | Aidirgandí or Piedra De Amolar     |      |        |        |       |         |        |
|            |                               | Wichub Mullu                       |      |        |        |       |         |        |
|            |                               | Playon Grande or Ukupa             |      |        |        |       |         |        |
|            | 5                             | Irgandi                            | 242  | 185    | 25.42  | 7.58  | 210.83  | < 0.01 |
|            |                               | Isla Pino                          |      |        |        |       |         |        |
|            | 7                             | Río Cañazas or Akanwila            | 635  | 259    | 66.69  | 4.08  | 163.79  | < 0.01 |
|            |                               | Puerto Limon or Narasgandi         |      |        |        |       |         |        |
|            | 19                            | Canaán Membrillo                   | 321  | 113    | 33.71  | 3.42  | 58.17   | < 0.01 |
|            |                               | Río Membrillo                      |      |        |        |       |         |        |
|            | 22                            | Bajo Chiquito                      | 363  | 119    | 38.12  | 3.19  | 5.40    | < 0.01 |
|            |                               |                                    |      |        |        |       |         |        |
|            |                               |                                    |      |        |        |       |         |        |
| 25         | Akuayala or Puente Bayano     | 1146                               | 213  | 120.36 | 1.81   | 30.04 | < 0.01  |        |
|            | Pintupu or Iguayala           |                                    |      |        |        |       |         |        |
|            | Wagandi or Wuagandi           |                                    |      |        |        |       |         |        |
